# Supplementary material for: Magnetic field effects on the quenching of triplet excitons in exciplex-based organic light emitting diodes
Source: Royal Society of Chemistry journal article supplement (doi:10.1039/c8tc01260a), 2018-01-01
Supplement: c8tc01260a1.pdf [file c8tc01260a1.pdf]

## Supporting Information

### **Magnetic Field Effects on the Quenching of Triplet Excitons in Exciplex-based Organic Light Emitting Diode**

Peisen Yuan,<sup>ab</sup> Xianfeng Qiao,<sup>c</sup> Donghang Yan,<sup>a</sup> and Dongge Ma<sup>\*ac</sup>

a State Key Laboratory of Polymer Physics and Chemistry, Changchun Institute of Applied Chemistry, University of Chinese Academy of Sciences, Changchun 130022, People's Republic of China

b University of Science and Technology of China, Hefei 230026, People's Republic of China

c Institute of Polymer Optoelectronic Materials and Devices, State Key Laboratory of Luminescent Materials and Devices, South China University of Technology, Guangzhou 510640, People's Republic of China

\* Corresponding Authors Dongge Ma ([mdg1014@ciac.ac.cn](mailto:mdg1014@ciac.ac.cn), [msdgm@scut.edu.cn](mailto:msdgm@scut.edu.cn))

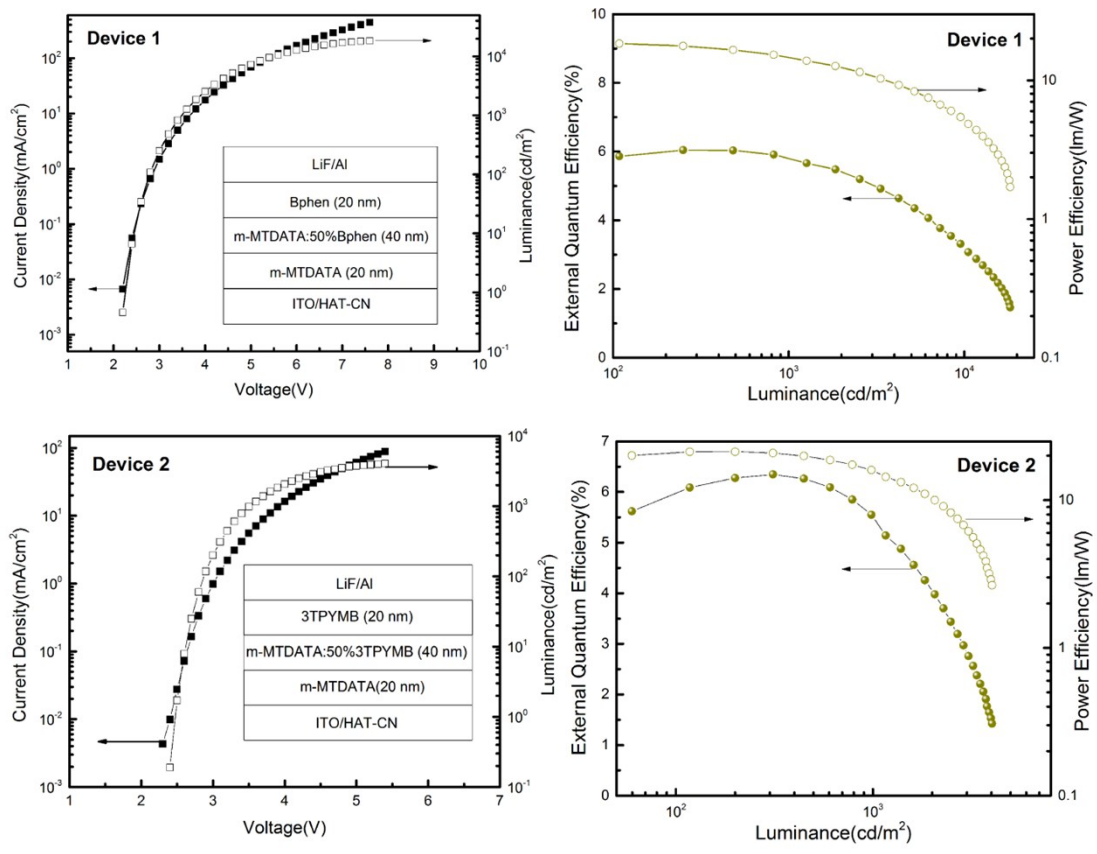

Fig. S1 Current density-voltage-luminance characteristics, external quantum efficiency and power efficiency versus luminance curves of Device 1 and Device 2.

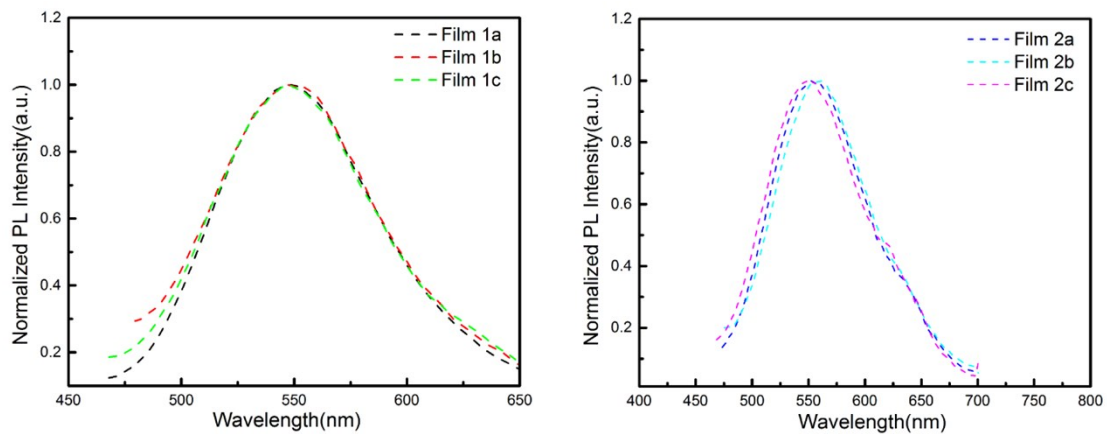

Fig. S2 PL spectra of different films for m-MTDATA: Bphen (left) and m-MTDATA: 3TPYMB (right) systems.

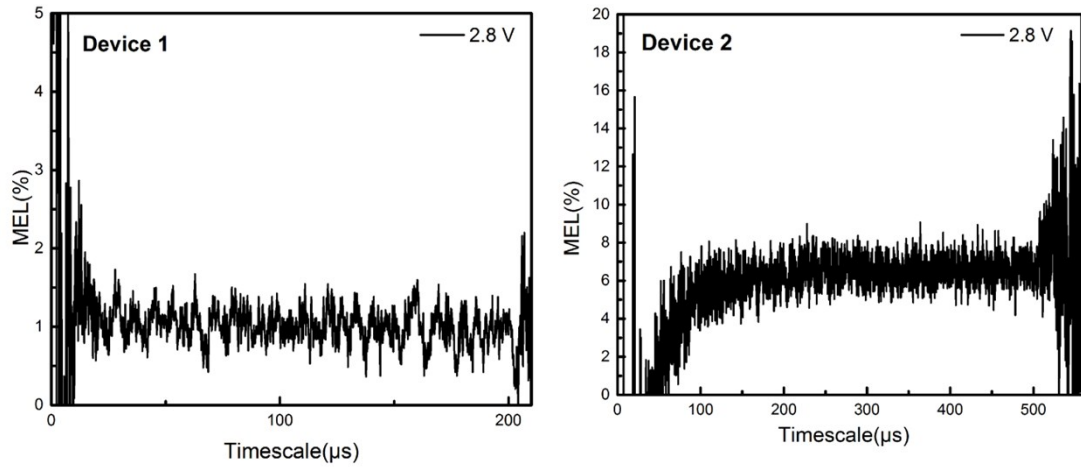

Fig. S3 Time-resolved MEL responses of Device 1 and Device 2 applied at 2.8 V.
